# Supplementary material for: Neutralizing blood-borne polyphosphate in vivo provides safe thromboprotection
Source: PubMed Central journal article supplement (PMC5025862; doi:10.1038/ncomms12616), 2016-09-06
Supplement: ncomms12616-s1.pdf [file ncomms12616-s1.pdf]

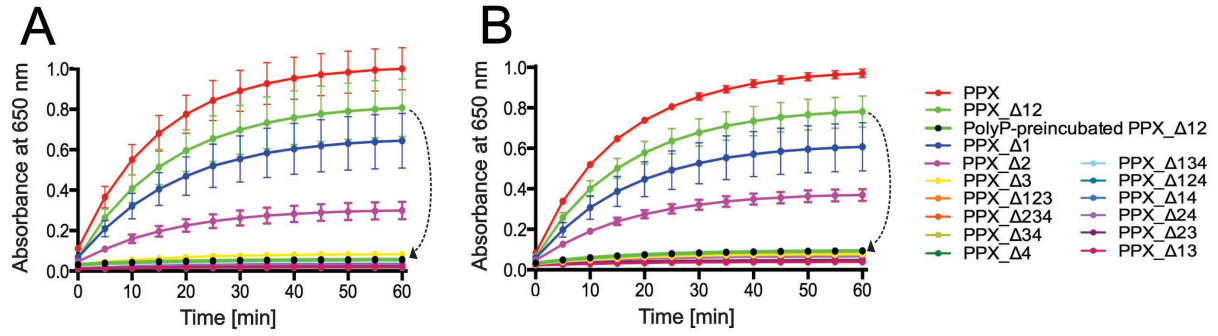

### SUPPLEMENTARY FIGURE 1. PPX variants binding to polyP.

Immobilized long-chain (A) or short-chain polyP (B) was incubated for 60 min with 10 nM purified full-size PPX, PPX deletion mutants or PPX\_Δ12 pre-incubated with polyP. Bound PPX variants were detected using an antibody against the 6xHis-tag, an HRP-coupled secondary antibody and substrate reaction. Kinetics of PPX variants binding to polyP is shown. Data blotted relative to full-size PPX, set to 1.0. Mean  $\pm$  SEM,  $n=4$ .

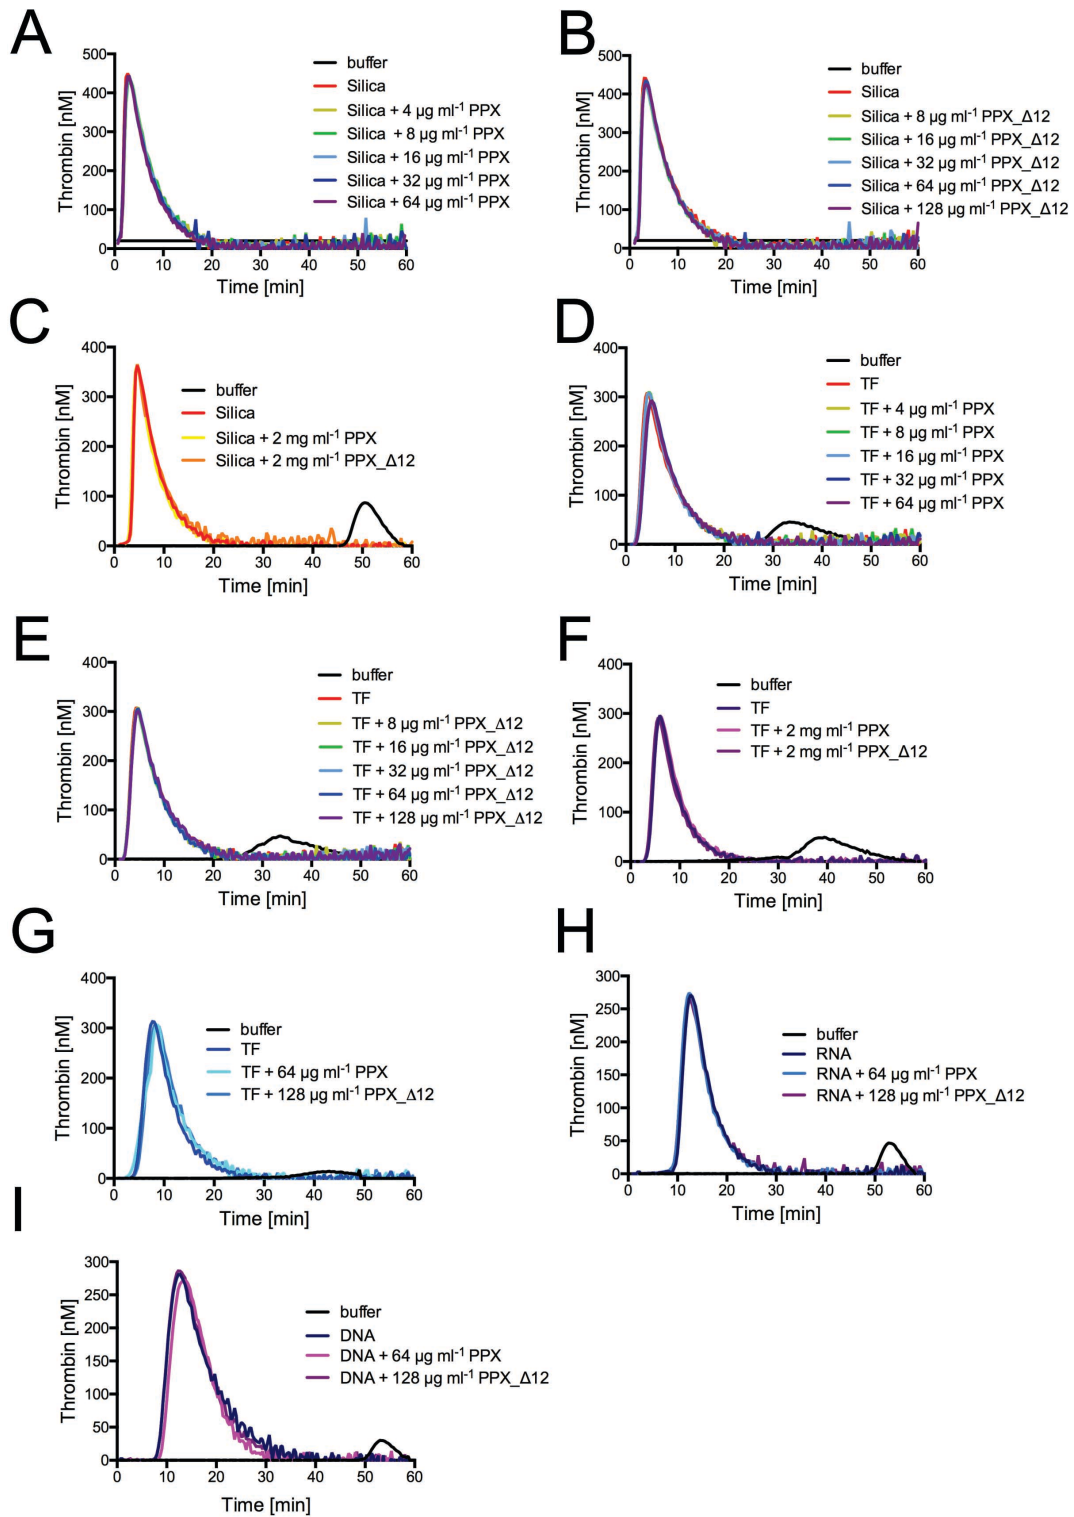

**SUPPLEMENTARY FIGURE 2. PPX and PPX $\Delta$ 12 do not interfere with silica-, TF-, RNA- or DNA-induced thrombin formation.**

Real-time thrombin generation in the absence or presence of increasing concentrations of PPX or PPX $\Delta$ 12 in PPP stimulated with silica (A-C), TF (5 pM, D-F; 1 pM, G), RNA (5  $\mu\text{g ml}^{-1}$ , H) or DNA (5  $\mu\text{g ml}^{-1}$ , I). Representative curves of a series of  $n=4$  are shown.

**A**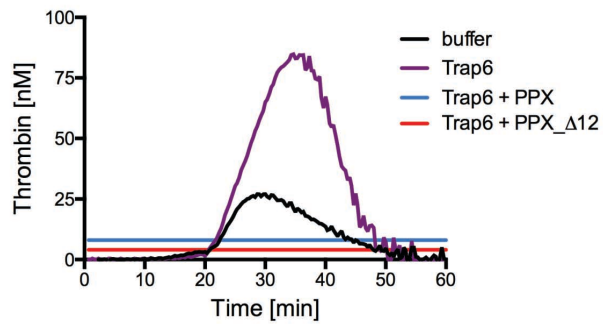**B**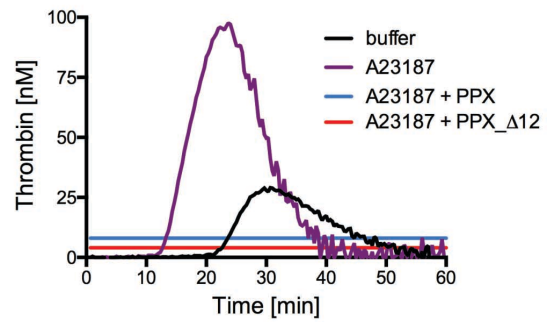

**SUPPLEMENTARY FIGURE 3. PPX and PPX\_Δ12 reduce activated platelet-driven thrombin generation.**

Real-time thrombin generation in PRP stimulated with (A) Trap6 (30 μM) or (B) Ca<sup>2+</sup> ionophore (A23187, 5 μM) in the absence or presence of PPX or PPX\_Δ12 (500 μg ml<sup>-1</sup> each). Representative curves from 4 independent experiments are shown.

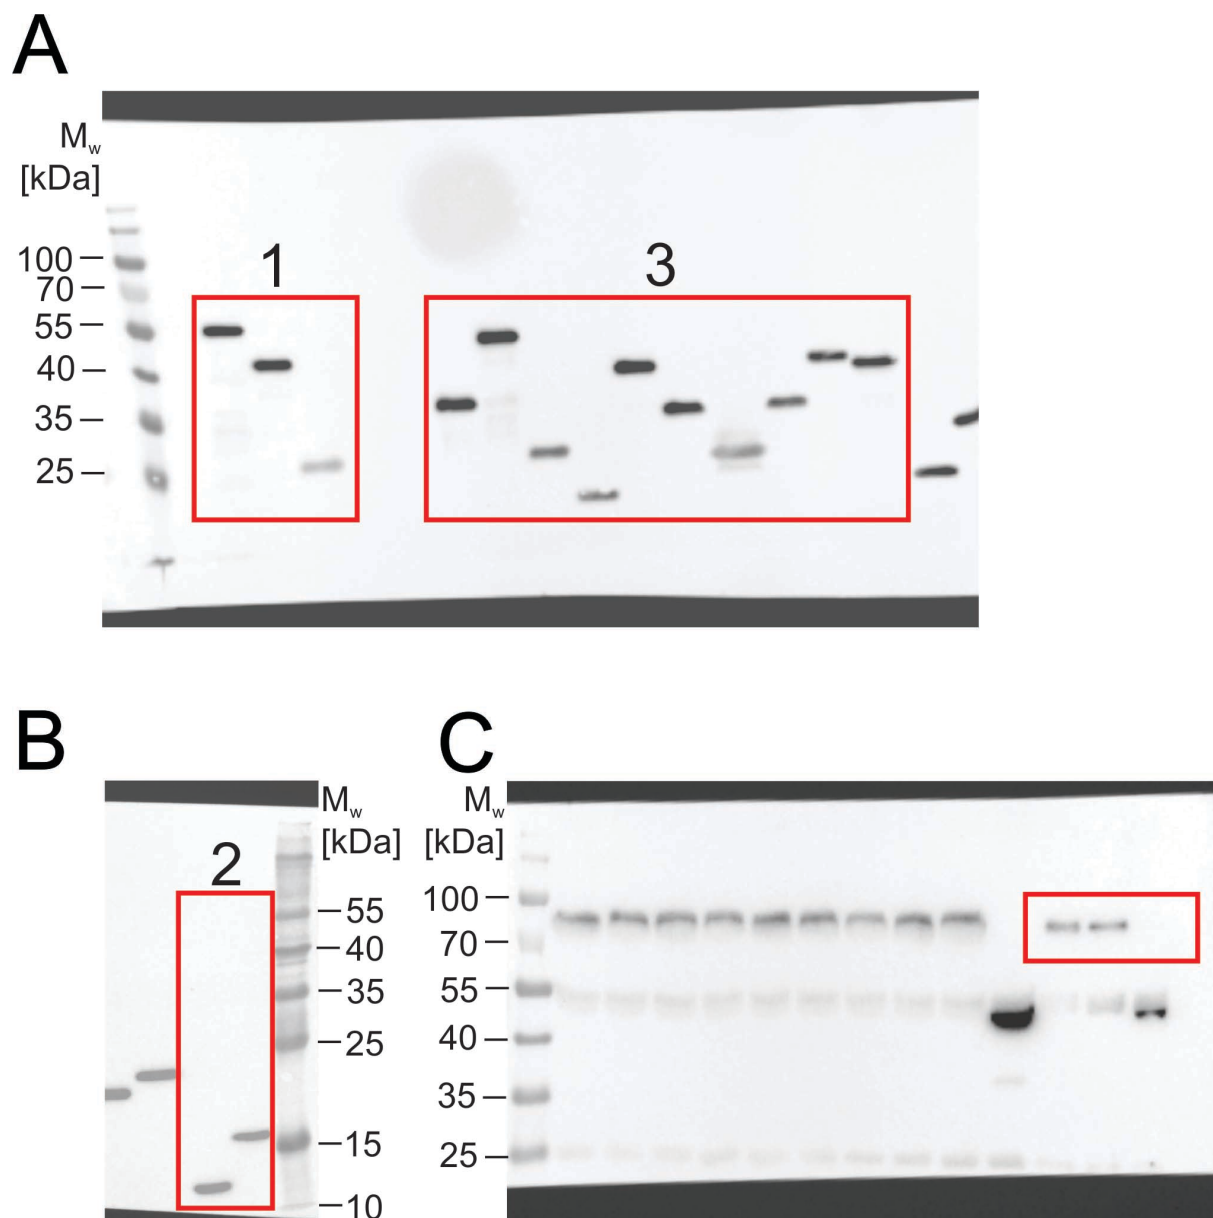

**SUPPLEMENTARY FIGURE 4. Full scans of Western blots.**

(A, B) Uncropped scans of Western blots are shown in manuscript figure 1C. Red squares denote areas that are depicted in the manuscript. Square 2 is inserted between squares 1 and 3. (C) Uncropped scan of the insert in manuscript figure 4H.

**SUPPLEMENTARY TABLE 1:** Polyphosphate binding and degradation capacity of PPX mutants.

| Mutant   | Binding | Degradation |
|----------|---------|-------------|
| PPX      | +       | +           |
| PPX_Δ1   | +       | +           |
| PPX_Δ12  | +       | -           |
| PPX_Δ123 | -       | -           |
| PPX_Δ234 | -       | -           |
| PPX_Δ34  | -       | -           |
| PPX_Δ4   | -       | -           |
| PPX_Δ134 | -       | -           |
| PPX_Δ124 | -       | -           |
| PPX_Δ14  | -       | -           |
| PPX_Δ24  | -       | -           |
| PPX_Δ23  | -       | -           |
| PPX_Δ13  | -       | -           |
| PPX_Δ3   | +       | +           |
| PPX_Δ2   | +       | +           |

**SUPPLEMENTARY TABLE 2:** Effects of PPX and PPX\_Δ12 on real time thrombin generation.

|                 | Lag time (min) | Time to peak (min) | Peak thrombin (nM) | ETP (nM*min) |
|-----------------|----------------|--------------------|--------------------|--------------|
| <b>LC polyP</b> | 3.8 ± 0.3      | 5.8 ± 0.4          | 418 ± 21           | 2727 ± 87    |
| + PPX           | 27.3 ± 1.6     | 35.1 ± 0.1         | 34 ± 1             | 450 ± 20     |
| + PPX_Δ12       | 24.6 ± 1.2     | 38.4 ± 0.6         | 18 ± 1             | 281 ± 17     |
| <b>SC polyP</b> | 16.1 ± 5.3     | 21.3 ± 0.2         | 175 ± 84           | 1748 ± 291   |
| + PPX           | 24.8 ± 3.1     | 30.5 ± 2.7         | 32 ± 16            | 454 ± 197    |
| + PPX_Δ12       | 32.1 ± 3.4     | 39.7 ± 3.4         | 33 ± 7             | 435 ± 117    |

LC and SC polyP-induced thrombin formation in the presence of PPX (64 μg ml<sup>-1</sup>) and PPX\_Δ12 (128 μg ml<sup>-1</sup>). Values are expressed as mean ± SEM, n=6. ETP=endogenous thrombin potential.
